# Supplementary material
Source: publisher figshare collection journal article supplement (https://tandf.figshare.com/ndownloader/files/13692914)
Supplement: Supplementary file 1 [file 13692914]

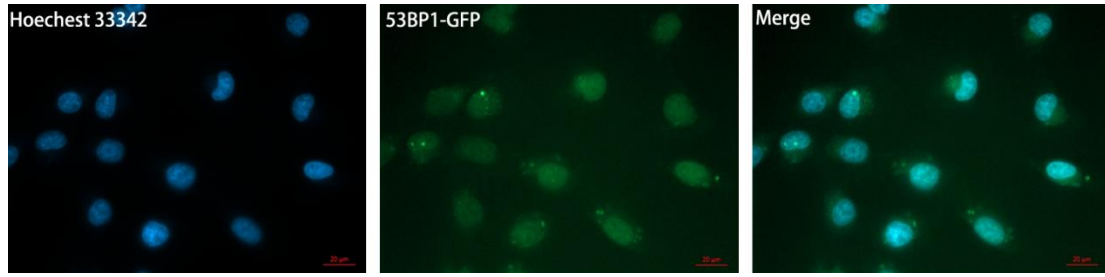

Figure S1. Representative image of 53BP1-GFP background level in mock-irradiated HT1080 cells. Spontaneous 53BP1 foci (green) and Hoechst 33342 nuclear stain (blue) are shown. Scale bar = 20  $\mu$ m.

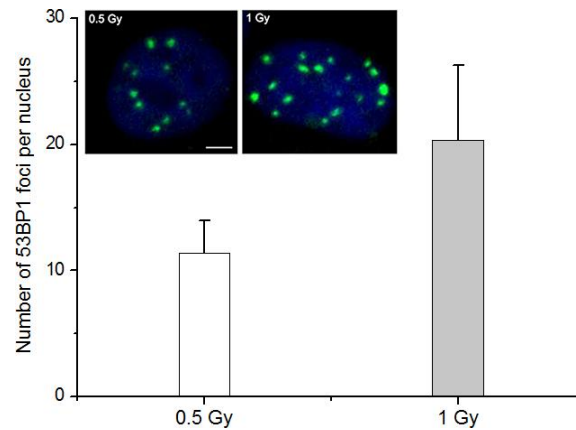

Figure S2. The number of 53BP1 IRIF per nucleus at 30 min post  $\gamma$ -irradiation at dose of 0.5 Gy and 1 Gy. Representative images were shown in upper left corner. Scale bar = 5  $\mu$ m.

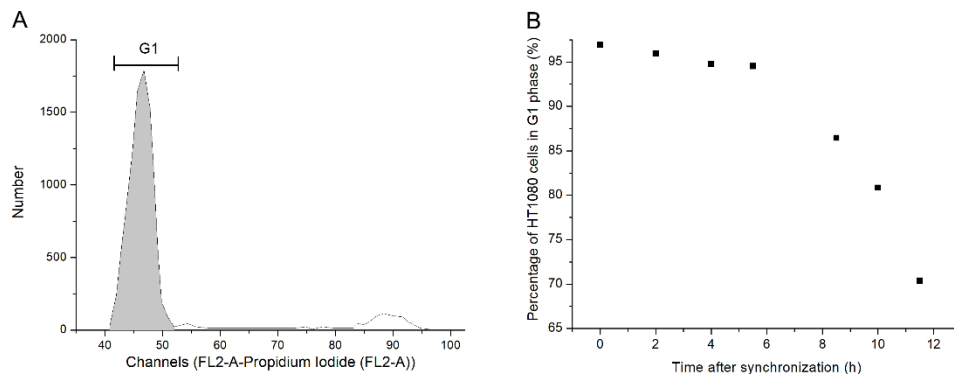

Figure S3. Cell synchronization. (A) Example of cell cycle distribution of 2h release after synchronization. The region of G1 phase was filled with gray. (B) The percentage of HT1080 cells in G1 phase at indicated time after 2h release from synchronization.
